# Supplementary material
Source: publisher figshare collection journal article supplement (https://acs.figshare.com/ndownloader/files/3789331)
Supplement: Supplementary file 1 [file 3789331]

# Supporting Information

## *Self-Assembly Process of Dodecanuclear Pt(II)-Linked Cyclic Hexagon*

Ayako Baba, Tatsuo Kojima, and Shuichi Hiraoka\*

*Department of Basic Science, Graduate School of Arts and Sciences*

*The University of Tokyo*

*3-8-1 Komaba, Meguro-ku, Tokyo 153-8902, Japan*

*E-mail: chiraoka@mail.ecc.u-tokyo.ac.jp*

### Contents

|                                                                                                                                                                 |         |
|-----------------------------------------------------------------------------------------------------------------------------------------------------------------|---------|
| • General information and materials                                                                                                                             | ····S2  |
| • Synthesis of Pt(II) dinuclear complexes                                                                                                                       | ····S2  |
| • <i>n-k</i> map for the self-assembly of a cyclic hexagon (Fig. S1)                                                                                            | ····S3  |
| • Procedure for the investigation of the self-assembly of a cyclic hexagon                                                                                      | ····S4  |
| • Determination of the average composition of the intermediates ( $[\text{Pt}_a\text{1}_b\text{Py}_c^*]^{2a+}$ ) in each time point (Tables S1 and S2)          | ····S5  |
| • ESI-TOF mass study for the self-assembly of $[\text{Pt}_6\text{1}_6]^{12+}$ (Fig. S2)                                                                         | ····S7  |
| • $^1\text{H}$ DOSY study for the self-assembly of $[\text{Pt}_6\text{1}_6]^{12+}$ (Figs. S3 - S5)                                                              | ····S8  |
| • $^1\text{H}$ NMR study for the self-assembly of $[\text{Pt}_6\text{1}_6]^{12+}$ from <b>1</b> and $[\text{Pt}(\text{CH}_3\text{CN})_2]^{2+}$ (Figs. S6 and 7) | ····S10 |
| • $^1\text{H}$ and $^{13}\text{C}$ NMR spectra of Pt(II) dinuclear complexes (Fig. S8 - S10)                                                                    | ····S11 |
| • References                                                                                                                                                    | ····S12 |

## General information

$^1\text{H}$  NMR,  $^{13}\text{C}$  NMR,  $^{31}\text{P}$  NMR, and  $^{19}\text{F}$  NMR spectra were recorded using a Bruker AV-500 (500 MHz) spectrometer. All  $^1\text{H}$  spectra were referenced using residual solvent peaks,  $\text{CD}_2\text{Cl}_2$  ( $\delta$  5.31) and  $\text{CD}_3\text{NO}_2$  ( $\delta$  4.33).  $^{13}\text{C}$  spectrum was referenced using a solvent peak,  $\text{CD}_3\text{NO}_2$  ( $\delta$  62.81).  $^{31}\text{P}$  NMR and  $^{19}\text{F}$  NMR were referenced using external standards, 85% aq. $\text{H}_3\text{PO}_4$  solution and trichlorofluoromethane. Electrospray ionization time-of-flight (ESI-TOF) mass spectra were obtained using a Waters Xevo G2-S ToF mass spectrometer.

## Materials

Unless otherwise noted, all solvents and reagents were obtained from commercial suppliers (TCI Co., Ltd., WAKO Pure Chemical Industries Ltd., KANTO Chemical Co., Ltd., and Sigma-Aldrich Co.) and were used as received. Ditopic ligand **1** and Pt(II) dinuclear complex **2** were prepared according to the literature.<sup>1,2</sup>

## Synthesis of Pt(II) dinuclear complexes

### Synthesis of $\text{Pt}(\text{CH}_3\text{CN})_2 \cdot (\text{OTf})_2$

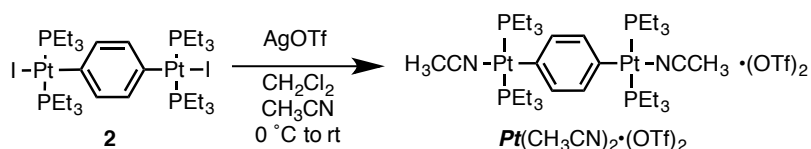

To a stirred solution of Pt(II) dinuclear complex **2** (50.0 mg, 41.9  $\mu\text{mol}$ ) in  $\text{CH}_2\text{Cl}_2$  (2 mL) and  $\text{CH}_3\text{CN}$  (0.5 mL) was added AgOTf (22.6 mg, 88.0 mmol) at 0  $^\circ\text{C}$  in the dark and under a nitrogen atmosphere. Then a light yellow suspension immediately formed. After stirring for 2 h at rt, the suspension was filtered to remove the precipitated AgI, and the filtrate was concentrated in vacuo. Then the residue was washed with water (2 mL  $\times$  3) to remove the unreacted AgOTf and dried in vacuo with slight heating (40  $^\circ\text{C}$ ) to afford  $\text{Pt}(\text{CH}_3\text{CN})_2 \cdot (\text{OTf})_2$  as a colorless solid (43.9 mg, 79%).  $^1\text{H}$  NMR (500 MHz,  $\text{CD}_3\text{NO}_2$ , 298 K):  $\delta$  6.97 (s, 4H), 2.50 (s, 6H), 1.85-1.60 (m, 24H), 1.16 (dt,  $J_{\text{PH}} = 16.7$  Hz,  $J_{\text{HH}} = 8.5$  Hz, 36H);  $^1\text{H}$  NMR (500 MHz,  $\text{CD}_2\text{Cl}_2$ , 298 K):  $\delta$  6.85 (s, 4H), 2.54 (s, 6H), 1.67-1.55 (m, 24H), 1.12 (dt,  $J_{\text{PH}} = 16.8$  Hz,  $J_{\text{HH}} = 8.2$  Hz, 36H);  $^{31}\text{P}\{^1\text{H}\}$  NMR (202 Hz,  $\text{CD}_3\text{NO}_2$ , 298 K):  $\delta$  11.6 (s,  $J_{\text{PPt}} = 2699$  Hz);  $^{19}\text{F}$  NMR (470 MHz,  $\text{CD}_3\text{NO}_2$ , 298 K):  $\delta$  -82.2; ESI-TOF mass  $m/z$  469.15  $[\text{M}-2\text{CH}_3\text{CN}-2\text{OTf}]^{2+}$ .  $^1\text{H}$  NMR spectrum of  $\text{Pt}(\text{CH}_3\text{CN})_2 \cdot (\text{OTf})_2$  is shown in Figure S8.

### Synthesis of $\text{PtPy}^*_2 \cdot (\text{OTf})_2$

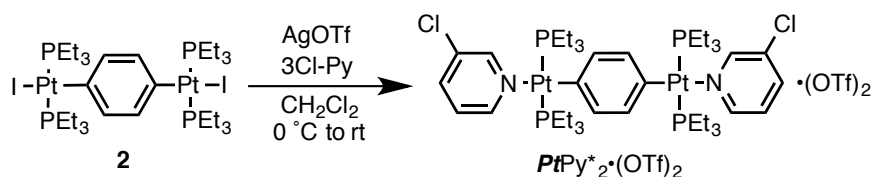

To a stirred solution of Pt(II) dinuclear complex **2** (49.9 mg, 41.9  $\mu\text{mol}$ ) and 3-chloropyridine ( $\text{Py}^*$ ) (8.4  $\mu\text{L}$ , 88 mmol) in  $\text{CH}_2\text{Cl}_2$  (2.5 mL) was added AgOTf (22.6 mg, 88.0 mmol) at 0  $^\circ\text{C}$  in the dark and under a nitrogen atmosphere. Then a light yellow suspension immediately formed. After stirring for 2 h at rt, the suspension was filtered to remove the precipitated AgI, and the filtrate was concentrated in vacuo. Then the residue was washed with water (2 mL  $\times$  3) to remove the unreacted AgOTf and dried in vacuo with slight heating (40  $^\circ\text{C}$ ) to afford  $\text{PtPy}^*_2 \cdot (\text{OTf})_2$  as a colorless solid (61.4 mg, 82%).  $^1\text{H}$  NMR (500 MHz,  $\text{CD}_3\text{NO}_2$ , 298 K):  $\delta$  8.87 (d,  $J_{\text{HH}} = 2.2$  Hz, 2H), 8.80 (dd,  $J_{\text{HH}} = 5.4, 1.1$  Hz, 2H), 8.09 (ddd,  $J_{\text{HH}} = 8.4, 2.2, 1.1$  Hz, 2H), 7.72 (dd,  $J_{\text{HH}} = 8.4, 5.4$  Hz, 2H), 7.30-7.05 (m, 4H), 1.54-1.39 (m, 24H), 1.15 (dt,  $J_{\text{PH}} = 16.5$  Hz,  $J_{\text{HH}} = 8.0$  Hz, 36H);  $^{13}\text{C}\{^1\text{H}\}$  NMR (126 Hz,  $\text{CD}_3\text{NO}_2$ , 298 K)  $\delta$  151.97, 151.92, 140.71, 137.80 (m,  $\text{C}_\text{o}-\text{Pt}$ ), 136.57, 129.52, 125.83 (t,  $^2J_{\text{CP}} = 9.5$  Hz,  $\text{C}_\text{r}-\text{Pt}$ ), 122.44 (q,  $^1J_{\text{CF}} = 321$  Hz, OTf), 13.60 (m,  $\text{PCH}_2\text{CH}_3$ ), 7.97 (brs,  $\text{PCH}_2\text{CH}_3$ );  $^{31}\text{P}\{^1\text{H}\}$  NMR (202 Hz,  $\text{CD}_3\text{NO}_2$ , 298 K):  $\delta$  10.7 (s,  $J_{\text{PPt}} = 2712$  Hz);  $^{19}\text{F}$  NMR (470 MHz,  $\text{CD}_3\text{NO}_2$ , 298 K):  $\delta$  -82.2; ESI-TOF mass  $m/z$  469.15  $[\text{M}-2\text{Py}^*-2\text{OTf}]^{2+}$ .  $^1\text{H}$  and  $^{13}\text{C}$  NMR spectra of  $\text{PtPy}^*_2 \cdot (\text{OTf})_2$  are shown in Figures S9 and S10, respectively.

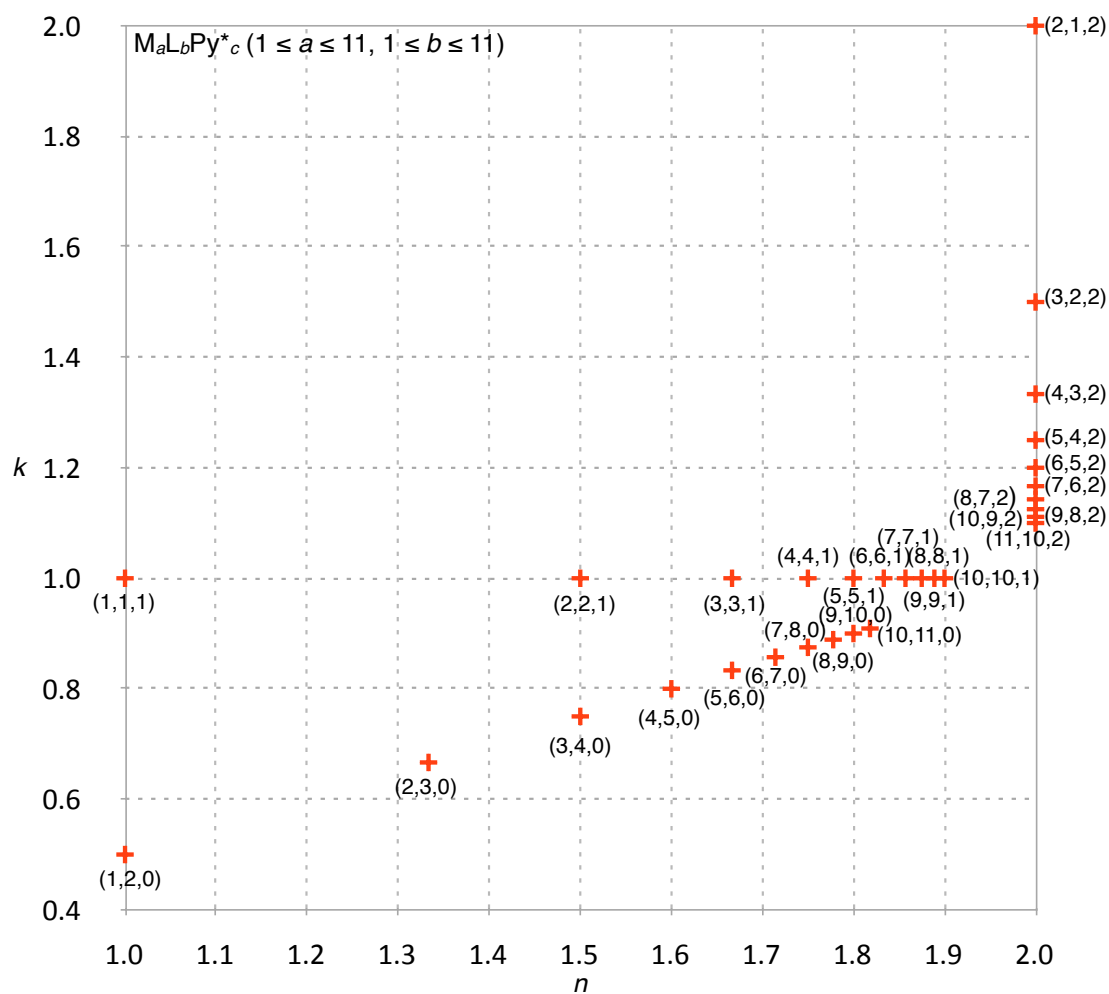

**Fig. S1 An  $n$ - $k$  map for the self-assembly of a cyclic hexagon.** The  $(n, k)$  values for species from  $M_1L_2$  to  $M_{11}L_{10}Py^*_2$  (30 species) are plotted as crosshairs in red. The  $M_aL_bPy^*_c$  complex is depicted as  $(a, b, c)$

### Procedure for the investigation of the self-assembly of a cyclic hexagon

As an internal standard solution, [2.2]paracyclophane (4.21 mg) was dissolved in  $\text{CHCl}_3$  (8.00 mL). The internal standard solution (40  $\mu\text{L}$ ) was introduced to two NMR tubes (tube A and B) and concentrated in vacuo. Then the mixture of  $\text{PtPy}^*_2\cdot(\text{OTf})_2$  (10.0 mg, 6.83  $\mu\text{mol}$ ) and 25  $\mu\text{L}$  of a 1,2,4,5-tetramethylbenzene solution in  $\text{CD}_3\text{NO}_2$  (1.00 mg in 100  $\mu\text{L}$   $\text{CD}_3\text{NO}_2$ ) was diluted with  $\text{CD}_3\text{NO}_2$  (225  $\mu\text{L}$ ) (solution A). Then 50  $\mu\text{L}$  of solution A was added to tube A and diluted with  $\text{CD}_3\text{NO}_2$  (400  $\mu\text{L}$ ). At this stage, the exact concentration of  $\text{PtPy}^*_2\cdot(\text{OTf})_2$  in this solution was unambiguously determined through the comparison with the quantity of [2.2]paracyclophane, 1,2,4,5-tetramethylbenzene, and  $\text{PtPy}^*_2\cdot(\text{OTf})_2$  by  $^1\text{H}$  NMR. Based on this concentration, the exact concentration of solution A was exactly determined. In parallel, ditopic ligand **1** (3.83 mg, 13.7  $\mu\text{mol}$ ) was dissolved in  $\text{CHCl}_3$  (500  $\mu\text{L}$ ) (solution B). Then 50  $\mu\text{L}$  of solution B was added to tube B, concentrated in vacuo, and dissolved in  $\text{CD}_3\text{NO}_2$  (450  $\mu\text{L}$ ). At this stage, the exact amount of ditopic ligand **1** in tube B was unambiguously quantified by  $^1\text{H}$  NMR using [2.2]paracyclophane as the internal standard. Then to the solution in tube B was added exactly 1 eq. of  $\text{PtPy}^*_2\cdot(\text{OTf})_2$  to ditopic ligand **1** in solution A at 273 K, and the self-assembly of the cyclic hexagon was monitored at 298 K by  $^1\text{H}$  NMR every 2 hours. The quantities of **1**,  $[\text{PtPy}^*_2]^{2+}$ ,  $[\text{Pt}_6\mathbf{1}_6]^{12+}$ , and  $\text{Py}^*$  were quantified by the integral of each  $^1\text{H}$  signal against the signal of the internal standard ([2.2]paracyclophane).

For the monitor of the self-assembly process,  $^1\text{H}$  NMR spectrum was measured with 30 s delay time and scanned 32 times. It took 20 min to obtain one  $^1\text{H}$  NMR spectrum. Because the detection of the species that converts to another species during the measurement is expected to be difficult, we estimate that the lifetime of the unobservable intermediates should be less than 20 min.

For the investigation of the self-assembly of a cyclic hexagon from **1** and  $\text{Pt}(\text{CH}_3\text{CN})_2\cdot(\text{OTf})_2$ , the same procedure was adopted in a different interval and the quantities of **1** and  $[\text{Pt}_6\mathbf{1}_6]^{12+}$  were quantified.

## Determination of the average composition of the fragment species, $[Pt_a1_bPy^*_c]^{2a+}$ , in each time point

The amounts of **1**,  $[PtPy^*_2]^{2+}$ ,  $[Pt_61_6]^{12+}$ , and  $Py^*$  at each time point during the self-assembly process were quantified by  $^1H$  NMR measurements using [2.2]paracyclophane as an internal standard.

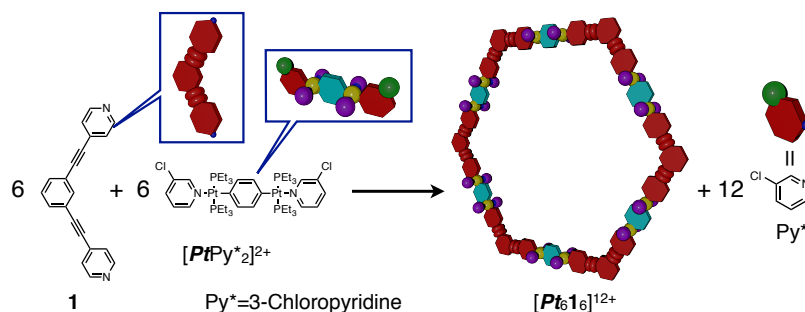

**Table S1.** The quantities of each component of the above scheme

| Time | <b>1</b> | $[PtPy^*_2]^{2+}$ | $[Pt_61_6]^{12+}$ | $Py^*$ |
|------|----------|-------------------|-------------------|--------|
| 0    | $l_0$    | $m_0$             | 0                 | 0      |
| $t$  | $l_t$    | $m_t$             | $n_t$             | $o_t$  |

At time  $t$ , the average composition of the intermediates,  $(Pt_a1_bPy^*_c)_{ave}$ , is expressed by equations (3) – (5).

$$a = m_0 - m_t - 6 \cdot n_t \quad \dots\dots (3)$$

$$b = l_0 - l_t - 6 \cdot n_t \quad \dots\dots (4)$$

$$c = 2 \cdot m_0 - 2 \cdot m_t - o_t \quad \dots\dots (5)$$

where  $l_0$  and  $m_0$  are the quantities for **1** and  $[PtPy^*_2]^{2+}$ , respectively at time = 0 and  $l_t$ ,  $m_t$ ,  $n_t$ , and  $o_t$  are the quantities for **1**,  $[PtPy^*_2]^{2+}$ ,  $[Pt_61_6]^{12+}$ , and  $Py^*$ , respectively at time =  $t$  (Table S1).

Then the  $\langle n \rangle$ ,  $\langle k \rangle$  values for  $(Pt_a1_bPy^*_c)_{ave}$  at each time point were determined by equations (1) and (2) in the main text. The data obtained for the self-assembly of  $[Pt_61_6]^{12+}$  are listed in Table S2.

**Table S2.** The quantities of **1**, [**PrPy\*<sub>2</sub>**]<sup>2+</sup>, [**Pr<sub>6</sub>1<sub>6</sub>**]<sup>12+</sup>, Py\*, and [**Pr1<sub>2</sub>**]<sup>2+</sup> and the values of *a*, *b*, and *c* and the (*<n>*, *<k>*) values at each time point for the self-assembly of [**Pr<sub>6</sub>1<sub>6</sub>**]<sup>12+</sup>

| Time<br>(min) | <b>1</b> | [ <b>PrPy*<sub>2</sub></b> ] <sup>2+</sup> | [ <b>Pr<sub>6</sub>1<sub>6</sub></b> ] <sup>12+</sup> | Py*   | [ <b>Pr1<sub>2</sub></b> ] <sup>2+</sup> | <i>a</i> | <i>b</i> | <i>c</i> | <i>&lt;n&gt;</i> | <i>&lt;k&gt;</i> |
|---------------|----------|--------------------------------------------|-------------------------------------------------------|-------|------------------------------------------|----------|----------|----------|------------------|------------------|
| 0             | 1.717    | 1.635                                      | 0.000                                                 | 0.000 | 0.000                                    | 0.000    | 0.000    | 0.000    | –                | –                |
| 120           | 1.588    | 1.366                                      | 0.000                                                 | 0.279 | 0.278                                    | 0.129    | 0.269    | -0.021   | 1.040            | 0.480            |
| 240           | 1.510    | 1.210                                      | 0.007                                                 | 0.481 | 0.466                                    | 0.163    | 0.381    | -0.068   | 1.033            | 0.427            |
| 360           | 1.407    | 1.023                                      | 0.010                                                 | 0.627 | 0.570                                    | 0.248    | 0.550    | -0.008   | 0.916            | 0.451            |
| 480           | 1.348    | 0.913                                      | 0.014                                                 | 0.806 | 0.678                                    | 0.284    | 0.638    | -0.070   | 1.000            | 0.445            |
| 800           | 1.220    | 0.727                                      | 0.018                                                 | 1.007 | 0.798                                    | 0.389    | 0.801    | -0.014   | 0.990            | 0.486            |
| 900           | 1.135    | 0.597                                      | 0.023                                                 | 1.133 | 0.857                                    | 0.444    | 0.900    | 0.030    | 0.953            | 0.493            |
| 1200          | 1.068    | 0.509                                      | 0.030                                                 | 1.288 | 0.935                                    | 0.466    | 0.943    | 0.010    | 0.977            | 0.494            |
| 1440          | 1.031    | 0.445                                      | 0.037                                                 | 1.416 | 0.978                                    | 0.461    | 0.965    | -0.045   | 1.001            | 0.478            |
| 2340          | 0.880    | 0.288                                      | 0.055                                                 | 1.674 | 1.017                                    | 0.505    | 1.016    | 0.000    | 0.995            | 0.497            |
| 2460          | 0.850    | 0.255                                      | 0.058                                                 | 1.712 | 1.010                                    | 0.517    | 1.030    | 0.022    | 0.983            | 0.502            |
| 2880          | 0.825    | 0.226                                      | 0.063                                                 | 1.742 | 0.988                                    | 0.511    | 1.028    | 0.041    | 0.953            | 0.497            |
| 3570          | 0.784    | 0.196                                      | 0.073                                                 | 1.842 | 0.966                                    | 0.498    | 1.004    | 0.024    | 0.969            | 0.496            |
| 4320          | 0.725    | 0.165                                      | 0.086                                                 | 1.981 | 0.962                                    | 0.474    | 0.953    | 0.002    | 0.994            | 0.498            |
| 5040          | 0.703    | 0.144                                      | 0.091                                                 | 1.979 | 0.928                                    | 0.470    | 0.947    | 0.048    | 0.941            | 0.496            |
| 5400          | 0.680    | 0.136                                      | 0.094                                                 | 2.030 | 0.911                                    | 0.474    | 0.937    | 0.042    | 0.967            | 0.506            |
| 7860          | 0.657    | 0.127                                      | 0.110                                                 | 2.151 | 0.864                                    | 0.401    | 0.850    | -0.032   | 0.981            | 0.472            |
| 8610          | 0.637    | 0.128                                      | 0.112                                                 | 2.166 | 0.830                                    | 0.405    | 0.832    | -0.006   | 0.981            | 0.487            |
| 9390          | 0.620    | 0.117                                      | 0.115                                                 | 2.142 | 0.815                                    | 0.406    | 0.828    | 0.051    | 0.920            | 0.491            |
| 10020         | 0.603    | 0.115                                      | 0.117                                                 | 2.218 | 0.820                                    | 0.410    | 0.816    | 0.010    | 0.993            | 0.502            |
| 11460         | 0.590    | 0.115                                      | 0.123                                                 | 2.214 | 0.800                                    | 0.389    | 0.783    | 0.040    | 0.944            | 0.497            |
| 12990         | 0.571    | 0.113                                      | 0.122                                                 | 2.225 | 0.759                                    | 0.411    | 0.787    | 0.067    | 0.960            | 0.522            |
| 14130         | 0.599    | 0.119                                      | 0.127                                                 | 2.246 | 0.766                                    | 0.355    | 0.754    | -0.011   | 0.957            | 0.471            |
| 18000         | 0.603    | 0.128                                      | 0.133                                                 | 2.294 | 0.760                                    | 0.317    | 0.711    | -0.068   | 0.987            | 0.446            |
| 19440         | 0.601    | 0.126                                      | 0.132                                                 | 2.301 | 0.754                                    | 0.323    | 0.716    | -0.069   | 0.999            | 0.451            |
| 19650         | 0.595    | 0.127                                      | 0.130                                                 | 2.250 | 0.767                                    | 0.340    | 0.726    | -0.007   | 0.945            | 0.468            |
| 20940         | 0.635    | 0.150                                      | 0.128                                                 | 2.250 | 0.785                                    | 0.317    | 0.720    | -0.087   | 0.945            | 0.440            |

# ESI-TOF mass study for the self-assembly of $[Pt_6\mathbf{1}_6]^{12+}$

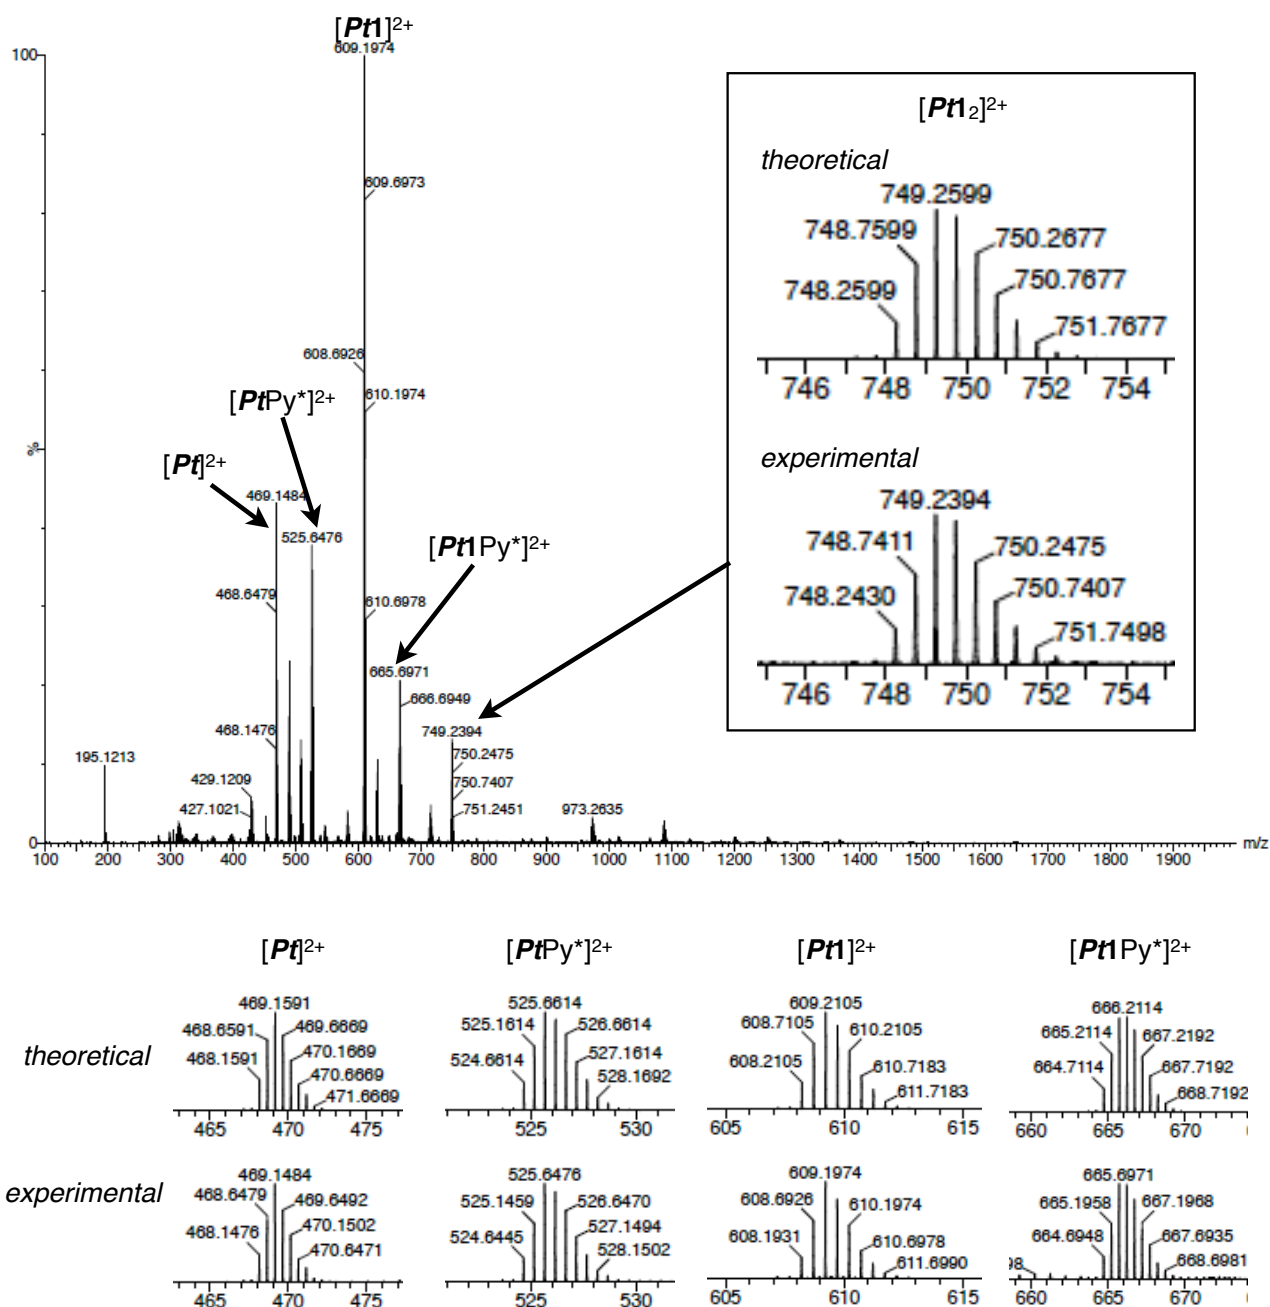

**Fig. S2** ESI-TOF mass spectrum of the equilibrated sample of the self-assembly of  $[Pt_6\mathbf{1}_6]^{12+}$  from **1** and  $[PtPy^*_2]^{2+}$ .

# <sup>1</sup>H DOSY study for the self-assembly of [Pt<sub>6</sub>1<sub>6</sub>]<sup>12+</sup>

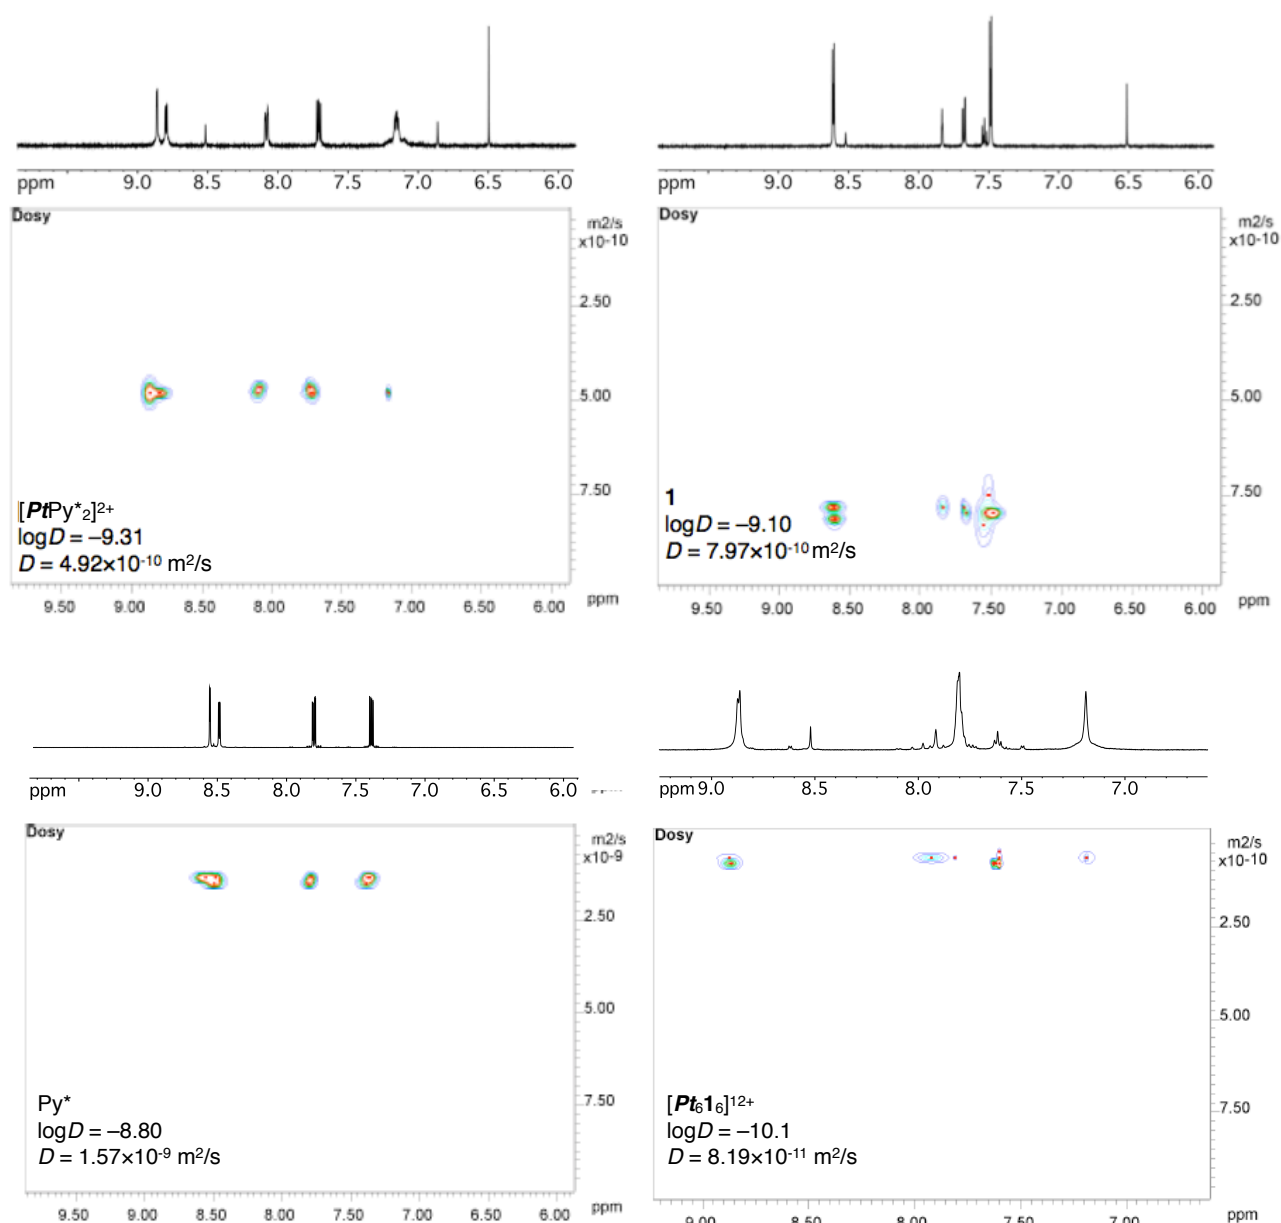

**Fig. S3** <sup>1</sup>H DOSY spectra (500 MHz, CD<sub>3</sub>NO<sub>2</sub>, 298 K) of [PtPy\*]<sub>2</sub><sup>2+</sup>, **1**, Py\*, and [Pt<sub>6</sub>1<sub>6</sub>]<sup>12+</sup>. [Pt<sub>6</sub>1<sub>6</sub>]<sup>12+</sup> was selectively obtained by mixing Pt(CH<sub>3</sub>CN)<sub>2</sub>·(OTf)<sub>2</sub> and **1** in a 1:1 ratio in CD<sub>2</sub>Cl<sub>2</sub> and then the solvent was replaced to CD<sub>3</sub>NO<sub>2</sub>.

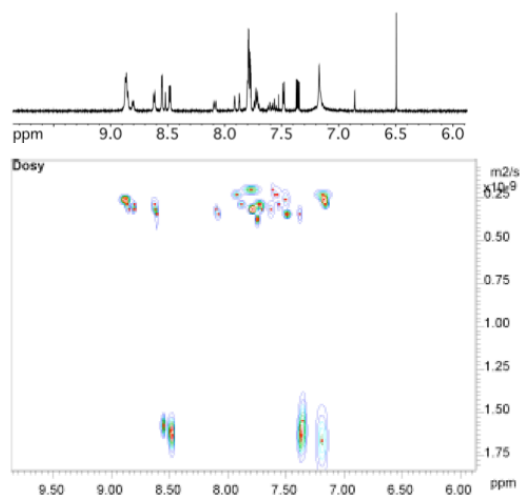

**Fig. S4** <sup>1</sup>H DOSY spectrum (500 MHz, CD<sub>3</sub>NO<sub>2</sub>, 298 K) of the equilibrated sample of the self-assembly of [Pt<sub>6</sub>L<sub>6</sub>]<sup>12+</sup> from **1** and [PtPy\*<sub>2</sub>]<sup>2+</sup>.

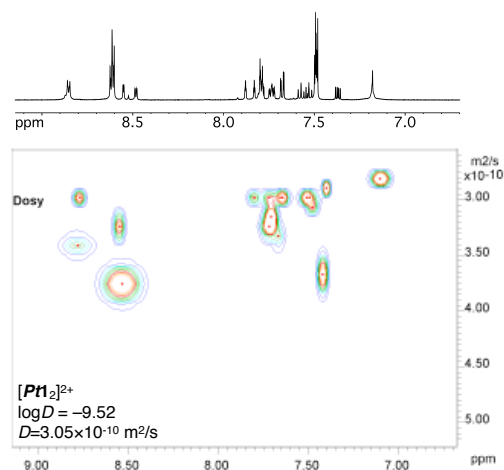

**Fig. S5** <sup>1</sup>H DOSY spectrum (500 MHz, CD<sub>3</sub>NO<sub>2</sub>, 298 K) of the mixture of **1** and [PtL<sub>2</sub>]<sup>2+</sup>. This mixture was obtained by mixing [PtPy\*<sub>2</sub>]<sup>2+</sup> and **1** in a 1:4 ratio.

**$^1\text{H}$  NMR study for the self-assembly of  $[\text{Pt}_6\text{1}_6]^{12+}$  from **1** and  $[\text{Pt}(\text{CH}_3\text{CN})_2]^{2+}$**

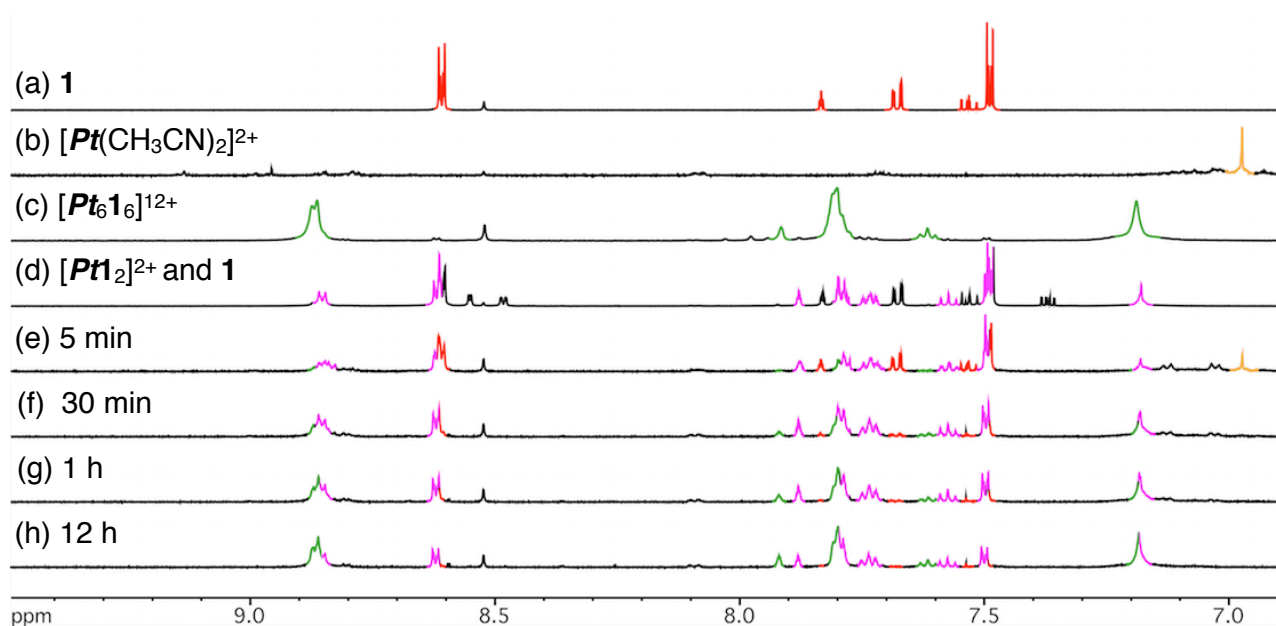

**Fig. S6**  $^1\text{H}$  NMR spectra of each component for the cyclic hexagon and the reaction mixture (500 MHz,  $\text{CD}_3\text{NO}_2$ , 298 K). (a) **1**, (b)  $[\text{Pt}(\text{CH}_3\text{CN})_2]^{2+}$ , (c)  $[\text{Pt}_6\text{1}_6]^{12+}$ , (d) a mixture of  $[\text{Pt1}_2]^{2+}$  and **1**, and the reaction mixture monitored at (e) 5 min, (f) 30 min, (g) 1 h, and (h) 12 h. Signals colored in red, yellow, green, and purple indicate **1**,  $[\text{Pt}(\text{CH}_3\text{CN})_2]^{2+}$ ,  $[\text{Pt}_6\text{1}_6]^{12+}$ , and  $[\text{Pt1}_2]^{2+}$ , respectively.

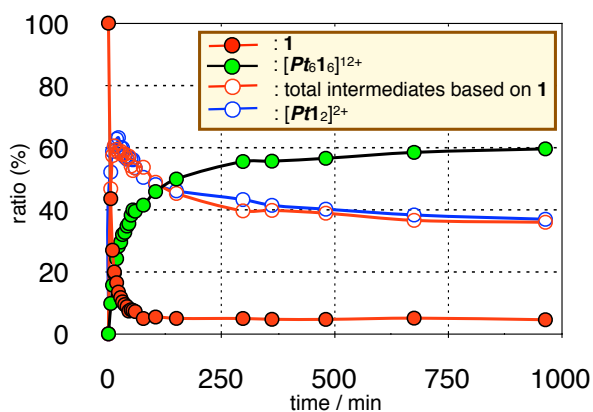

**Fig. S7** Time variation of each species in the reaction mixture of the self-assembly of the cyclic hexagon and the abundance ratio of total intermediates based on **1**.

# <sup>1</sup>H and <sup>13</sup>C NMR spectra of Pt(II) dinuclear complexes

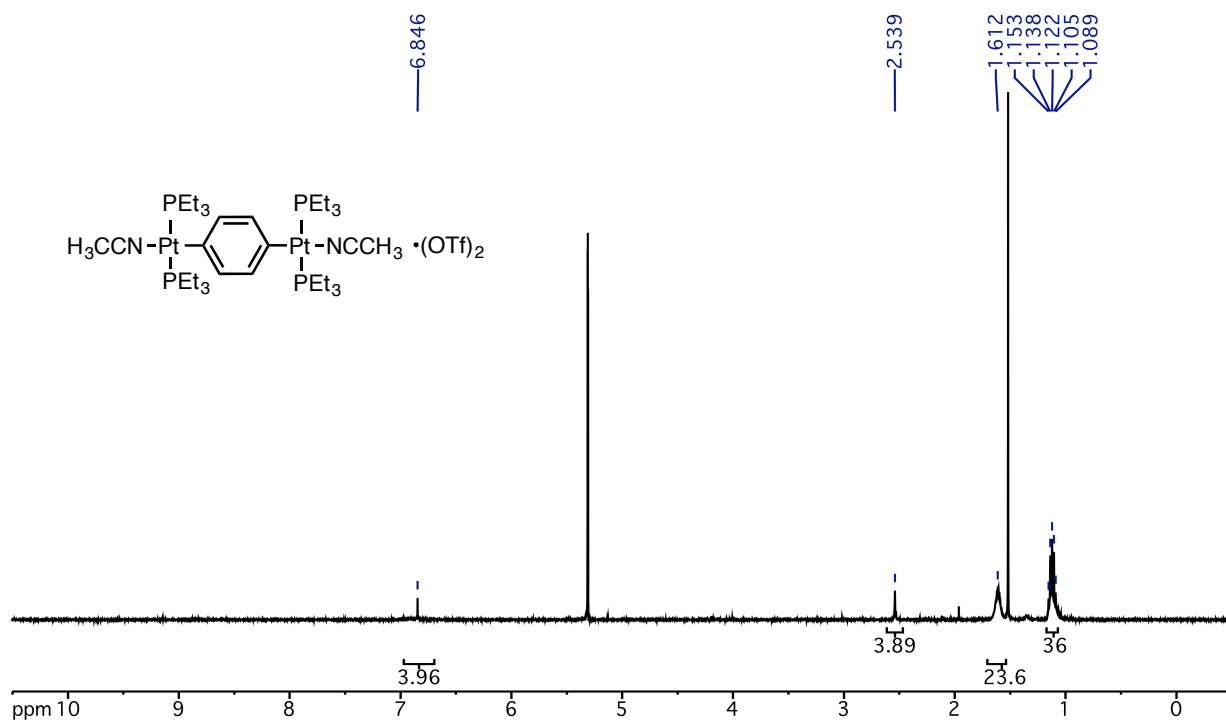

**Fig. S8** <sup>1</sup>H NMR spectrum (500 MHz, CD<sub>2</sub>Cl<sub>2</sub>, 298 K) of **Pt**(CH<sub>3</sub>CN)<sub>2</sub>·(OTf)<sub>2</sub>.

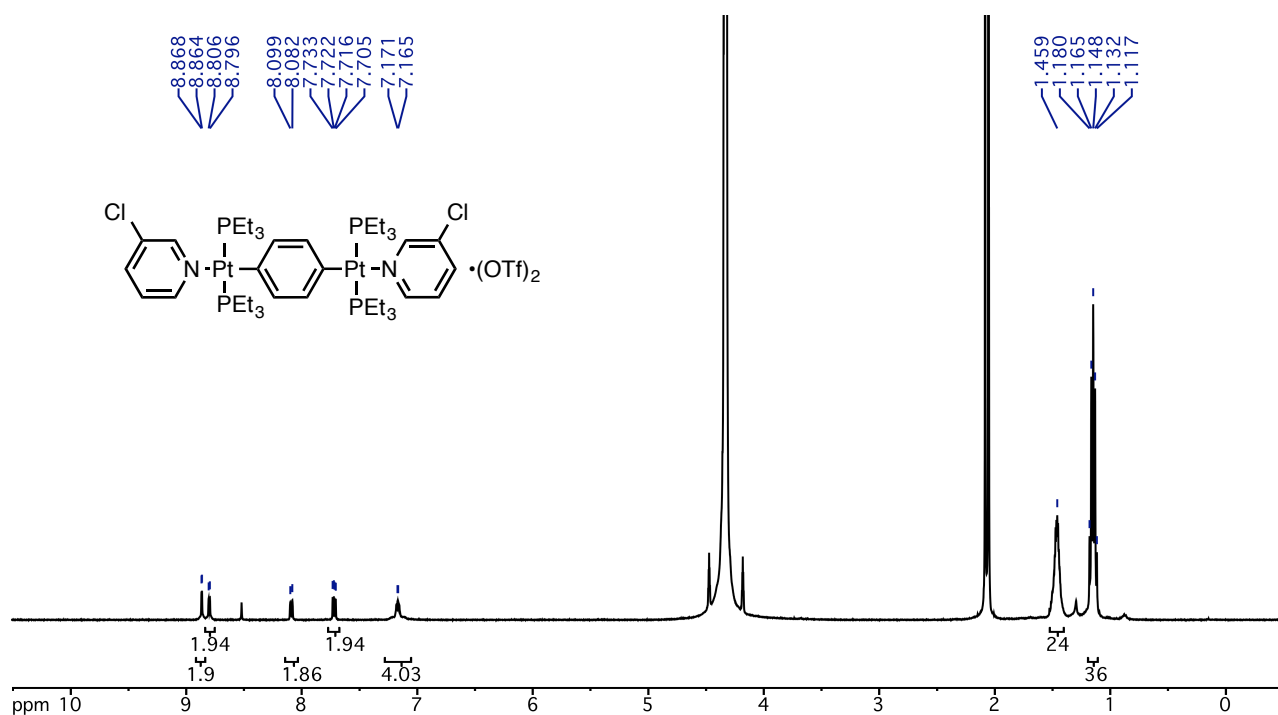

**Fig. S9** <sup>1</sup>H NMR spectrum (500 MHz, CD<sub>3</sub>NO<sub>2</sub>, 298 K) of **PtPy**\*<sub>2</sub>·(OTf)<sub>2</sub>.

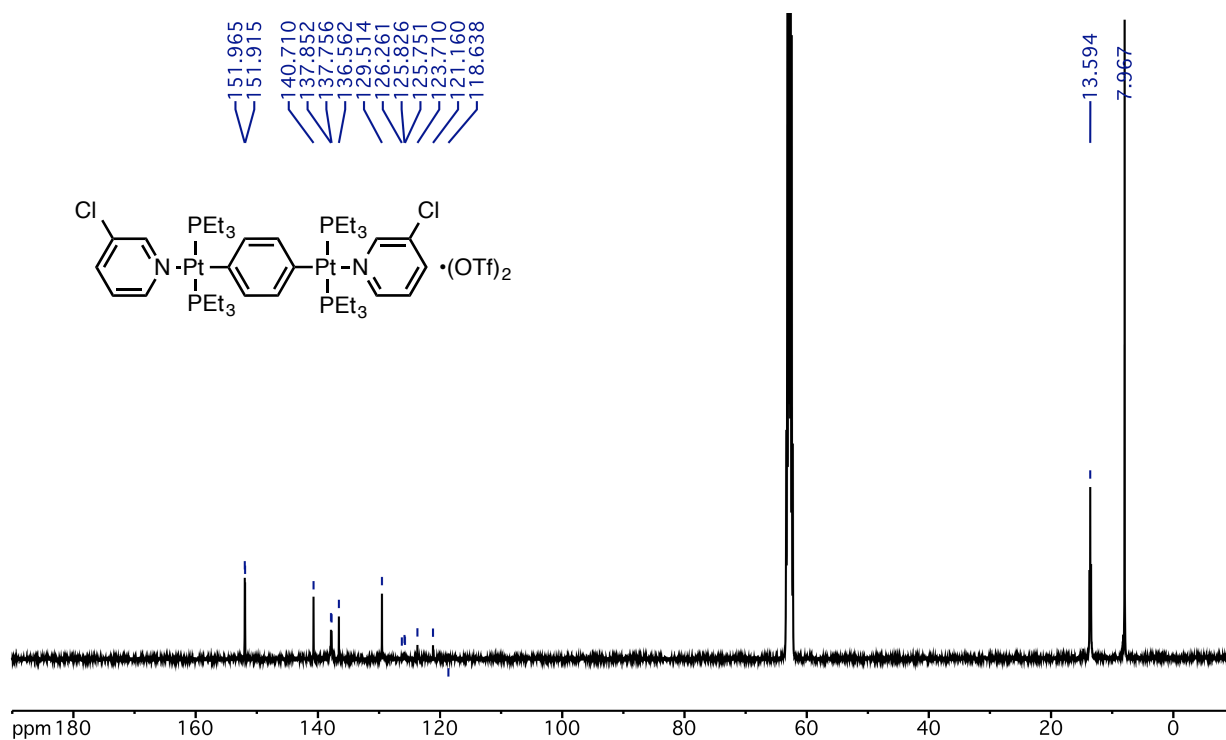

**Fig. S10**  $^{13}\text{C}$  NMR spectrum (126 MHz,  $\text{CD}_3\text{NO}_2$ , 298 K) of  $\text{PtPy}^*_2 \cdot (\text{OTf})_2$ .

## References

- [1] Kaae, B. H.; Harpsøe, K.; Kvist, T.; Mathiesen, J. M.; Mølck, M.; Gloriam, D.; Jimenez, H. N.; Uberti, M. A.; Nielsen, S. M.; Nielsen, B.; Bräuner-Osborne, H.; Sauerberg, P.; Clausen, R. P.; Madsen, U. *ChemMedChem*, **2012**, 7, 440.
- [2] Gardinier, J. R.; Clérac, R.; Gabbai, F. P. *J. Chem. Soc., Dalton Trans.* **2001**, 3453.
